# Supplementary material
Source: ML conference proceedings conference paper supplement (https://proceedings.mlr.press/v33/ramdas14.html)
Supplement: Supplementary file 1 [file ramdas14-supp.pdf]

---

# Active Learning With Uniform Feature Noise : Appendix

---

## 1 Justifying Claims in the Lower Bounds

Approximations:

1.  $(x + y)^k = x^k(1 + y/x)^k \approx x^k + kx^{k-1}y$  when  $y \prec x$ . Even when  $y \preceq x$ , both terms are the same order.
2.  $(x - y)^k = x^k(1 - y/x)^k \approx x^k - kx^{k-1}y$  when  $y \prec x$ . Even when  $y \preceq x$  both terms are the same order.
3. When  $y < x$  but not  $y \prec x$ , by Taylor expansion of  $(1+z)^k$  around  $z = 0$ , we have  $(x+y)^k = x^k(1+y/x)^k = x^k[1 + (1+c)^{k-1}y/x] = x^k + Cx^{k-1}y$  for some  $0 < c < y/x < 1$  and some constant  $C$ . Similarly for  $(x-y)^k$ .

Let's assume the boundary is at  $-\sigma$  for easier calculations. (we denote  $a_n, \sigma_n$  as  $a, \sigma$  here). Remember

$$m_1(x) = 1/2 + cx|x|^{k-2} \text{ if } x \geq -\sigma$$

$$m_2(x) = \begin{cases} 1/2 + c(x-a)|x-a|^{k-2} & \text{if } x < \beta a + \sigma \\ m_1(x) & \text{if } x \geq \beta a + \sigma \end{cases}$$

where  $\beta = \frac{1}{1-(c/C)^{1/(k-1)}} \geq 1$  is such that  $m_2 \in P(\kappa, c, C, \sigma)$ . Clearly, when  $x < \beta a + \sigma$ ,  $m_2$  satisfies condition (T). So, we only need to verify that whenever  $x \geq \beta a + \sigma$  we have

$$m_2(x) - 1/2 = cx^{k-1} \leq C(x-a)^{k-1} \quad (1)$$

This statement holds iff  $(c/C)^{1/(k-1)} \leq 1 - a/x \Leftrightarrow a/x \leq 1 - (c/C)^{1/(k-1)} \Leftrightarrow x \geq \beta a$ , which holds for all  $\sigma \geq 0$ , and hence  $m_2$  satisfies condition (T).

Proposition 1. When  $\sigma \prec a$ ,  $\max_w |F_1(w) - F_2(w)| \asymp a^{k-1}$

Proposition 2. When  $\sigma \succ a$   $\max_w |F_1(w) - F_2(w)| \asymp \sigma^{k-2}a$

Let us now prove these two propositions, with detailed calculations in each case (note that when  $\sigma \asymp a$ , then  $\max_w |F_1(w) - F_2(w)| \asymp a^{k-1} \asymp \sigma^{k-2}a$ , and can be checked using our approximations 1,2,3).

1. When  $\sigma \prec a$ , we will prove proposition 1. Remember that we can't query in  $-\sigma \leq w \leq 0$ .

(a) When  $0 \leq w \leq \sigma$ , we have

$$F_1(w) = (m_1 \star U)(w) = \int_{w-\sigma}^0 (1/2 - cx|x|^{k-2})dx/2\sigma + \int_0^{w+\sigma} (1/2 + cx^{k-1})dx/2\sigma \quad (2)$$

$$= 1/2 + \frac{c}{2\sigma k} [(w+\sigma)^k - (\sigma-w)^k] \quad (3)$$

$$= 1/2 + \frac{c}{2\sigma k} \sigma^k [(1+w/\sigma)^k - (1-w/\sigma)^k] \quad (4)$$

$$\approx 1/2 + c\sigma^{k-2}w \quad (5)$$

$$F_2(w) = (m_2 \star U)(w) = \int_{w-\sigma}^{w+\sigma} (1/2 - c(x-a)|x-a|^{k-2})dx/2\sigma \quad (6)$$

$$= 1/2 - \frac{c}{2\sigma k} [(a-w-\sigma)^k - (a+\sigma-w)^k] \quad (7)$$

$$\approx 1/2 - c(a-w)^{k-1} \quad (8)$$

$$(9)$$

[Boundaries:  $F_1(0) - \frac{1}{2} = 0, F_1(\sigma) - \frac{1}{2} \asymp \sigma^{k-1}, F_2(0) - \frac{1}{2} \asymp -a^{k-1}, F_2(\sigma) - \frac{1}{2} \asymp -a^{k-1}$ ].

$$F_1(w) - F_2(w) \preceq a^{k-1} \quad (10)$$

(b) When  $\sigma \leq w \leq a - \sigma$

$$F_1(w) = (m_1 \star U)(w) = \int_{w-\sigma}^{w+\sigma} (1/2 + cx^{k-1})dx/2\sigma \quad (11)$$

$$= 1/2 + \frac{c}{2\sigma k} [(w + \sigma)^k - (w - \sigma)^k] \quad (12)$$

$$\approx 1/2 + cw^{k-1} \quad (13)$$

$$F_2(w) = (m_2 \star U)(w) = \int_{w-\sigma}^{w+\sigma} (1/2 - c(x - a)|x - a|^{k-2})dx/2\sigma \quad (14)$$

$$= 1/2 - \frac{c}{2\sigma k} [(a - w + \sigma)^k - (a + \sigma - w)^k] \quad (15)$$

$$\approx 1/2 - c(a - w)^{k-1} \quad (16)$$

[Boundaries:  $F_1(\sigma) - \frac{1}{2} \asymp \sigma^{k-1}$ ,  $F_1(a - \sigma) - \frac{1}{2} \asymp a^{k-1}$ ,  $F_2(\sigma) - \frac{1}{2} \asymp -a^{k-1}$ ,  $F_2(a - \sigma) - \frac{1}{2} \asymp -\sigma^{k-1}$ ].

$$F_1(w) - F_2(w) = cw^{k-1} + c(a - w)^{k-1} \quad (17)$$

$$\leq c(a - \sigma)^{k-1} + c(a - \sigma)^{k-1} \quad (18)$$

$$\preceq a^{k-1} \quad (19)$$

(c) When  $a - \sigma \leq w \leq a$

$$F_1(w) \approx 1/2 + cw^{k-1} \quad (20)$$

$$F_2(w) = \int_{w-\sigma}^a (1/2 - c(x - a)|x - a|^{k-2})dx/2\sigma + \int_a^{w+\sigma} 1/2 + c(x - a)^{k-1}dx/2\sigma \quad (21)$$

$$= 1/2 - \frac{c}{2\sigma k} [(a - w + \sigma)^k - (w + \sigma - a)^k] \quad (22)$$

$$\approx 1/2 - c\sigma^{k-2}(a - w) \quad (23)$$

[Boundaries:  $F_1(a - \sigma) - \frac{1}{2} \asymp a^{k-1}$ ,  $F_1(a) - \frac{1}{2} \asymp a^{k-1}$ ,  $F_2(a - \sigma) - \frac{1}{2} \asymp -\sigma^{k-1}$ ,  $F_2(a) - \frac{1}{2} = 0$ ]

$$F_1(w) - F_2(w) \approx cw^{k-1} + c\sigma^{k-2}(a - w) \quad (24)$$

$$\leq ca^{k-1} + c\sigma^{k-2}\sigma \quad (25)$$

$$\preceq a^{k-1} \quad (26)$$

(d) When  $a \leq w \leq a + \sigma$

$$F_1(w) \approx 1/2 + cw^{k-1} \quad (27)$$

$$F_2(w) \approx 1/2 + c\sigma^{k-2}(a - w) \quad (28)$$

[Boundaries:  $F_1(a) - \frac{1}{2} \asymp a^{k-1}$ ,  $F_1(a + \sigma) - \frac{1}{2} \asymp a^{k-1}$ ,  $F_2(a) - \frac{1}{2} = 0$ ,  $F_2(a + \sigma) - \frac{1}{2} \asymp \sigma^{k-1}$ ]

$$F_1(w) - F_2(w) \preceq a^{k-1}$$

(e) When  $a + \sigma \leq w \leq \beta a - \sigma$

$$F_1(w) \approx 1/2 + cw^{k-1} \quad (29)$$

$$F_2(w) = \int_{w-\sigma}^{w+\sigma} 1/2 + c(x - a)^{k-1}dx/2\sigma \quad (30)$$

$$= 1/2 + \frac{c}{2\sigma k} [(w + \sigma - a)^k - (w - \sigma - a)^k] \quad (31)$$

$$\approx 1/2 + c(w - a)^{k-1} \quad (32)$$

---


$$[\text{B: } F_1(a + \sigma) - \frac{1}{2} \asymp a^{k-1}, F_1(\beta a - \sigma) - \frac{1}{2} \asymp a^{k-1}, F_2(a + \sigma) - \frac{1}{2} \asymp \sigma^{k-1}, F_2(\beta a - \sigma) - \frac{1}{2} \asymp a^{k-1}]$$

$$F_1(w) - F_2(w) \approx cw^{k-1} - c(w-a)^{k-1} \quad (33)$$

$$\leq c(\beta a - \sigma)^{k-1} + c\sigma^{k-1} \quad (34)$$

$$\leq c(\beta^{k-1} + 1)a^{k-1} \quad (35)$$

$$\preceq a^{k-1} \quad (36)$$

(f) When  $\beta a - \sigma \leq w \leq \beta a + \sigma$

$$F_1(w) \approx 1/2 + cw^{k-1} \quad (37)$$

$$F_2(w) = \int_{w-\sigma}^{\beta a} 1/2 + c(x-a)^{k-1} dx/2\sigma + \int_{\beta a}^{w+\sigma} 1/2 + x^{k-1} dx/2\sigma \quad (38)$$

$$= 1/2 + \frac{c}{2\sigma k} [(\beta a - a)^k - (w - \sigma - a)^k + (w + \sigma)^k - (\beta a)^k] \quad (39)$$

$$[F_1(\beta a - \sigma) - \frac{1}{2} \asymp a^{k-1}, F_1(\beta a + \sigma) - \frac{1}{2} \asymp a^{k-1}, F_2(\beta a - \sigma) - \frac{1}{2} \asymp a^{k-1}, F_2(\beta a + \sigma) - \frac{1}{2} \asymp a^{k-1}]$$

$$\begin{aligned} F_1(w) - F_2(w) &= cw^{k-1} + \frac{c}{2\sigma k} [(\beta^k - (\beta-1)^k)a^k + (w - \sigma - a)^k - (w - \sigma)^k] \\ &\leq c(\beta+1)^{k-1}a^{k-1} + \frac{c}{2\sigma k} [(\beta a)^k - (\beta a - 2\sigma)^k] - \frac{c}{2\sigma k} [(\beta-1)^k a^k - ((\beta-1)a - \sigma)^k] \\ &\approx c(\beta+1)^{k-1}a^{k-1} + \frac{c}{2\sigma k} [k(\beta a)^{k-1}2\sigma] - \frac{c}{2\sigma k} [k(\beta-1)^{k-1}a^{k-1}\sigma] \\ &= ca^{k-1}[(\beta+1)^{k-1} + \beta^{k-1} - \frac{1}{2}(\beta-1)^{k-1}] \\ &\asymp a^{k-1} \end{aligned}$$

(g) When  $\beta a + \sigma \leq w \leq \beta a + 2\sigma$

$$F_1(w) = 1/2 + \frac{c}{2\sigma k} [(w + \sigma)^k - (w - \sigma)^k] \quad (40)$$

$$\begin{aligned} F_2(w) &= \int_{w-\sigma}^{\beta a + \sigma} 1/2 + c(x-a)^{k-1} dx/2\sigma + \int_{\beta a + \sigma}^{w+\sigma} 1/2 + cx^{k-1} dx/2\sigma \\ &= 1/2 + \frac{c}{2\sigma k} [(\beta a + \sigma - a)^k - (w - \sigma - a)^k + (w + \sigma)^k - (\beta a + \sigma)^k] \end{aligned}$$

$$[F_1(\beta a + \sigma) - \frac{1}{2} \asymp a^{k-1}, F_1(\beta a + 2\sigma) - \frac{1}{2} \asymp a^{k-1}, F_2(\beta a + \sigma) - \frac{1}{2} \asymp a^{k-1}, F_2(\beta a + 2\sigma) - \frac{1}{2} \asymp a^{k-1}]$$

$$F_1(w) - F_2(w) = \frac{c}{2\sigma k} [(\beta a + \sigma)^k - (\beta a + \sigma - a)^k + (w - \sigma - a)^k - (w - \sigma)^k] \quad (41)$$

$$\approx \frac{c}{2\sigma k} [(\beta a + \sigma)^{k-1}ka - (w - \sigma)^{k-1}ka] \quad (42)$$

$$\leq \frac{ca}{2\sigma} [(\beta a + \sigma)^{k-1} - (\beta a)^{k-1}] \quad (43)$$

$$\approx \frac{ca}{2\sigma} [(\beta a)^{k-1}(1 + \frac{(k-1)\sigma}{\beta a}) - (\beta a)^{k-1}] \quad (44)$$

$$= a^{k-1} [c\beta^{k-2}(k-1)/2] \quad (45)$$

$$\asymp a^{k-1} \quad (46)$$

(h) When  $w \geq \beta a + 2\sigma$

$$F_1(w) = F_2(w)$$

That completes the proof of the first claim.

2. When  $\sigma \succ a$ , we will prove the second proposition.

(a) When  $-\sigma \leq w \leq 0$ , we are not allowed to query here.

(b) When  $0 < w \leq \beta a$

$$F_1(w) = (m_1 \star U)(w) = \int_{w-\sigma}^0 (1/2 - cx|x|^{k-2})dx/2\sigma + \int_0^{w+\sigma} (1/2 + cx^{k-1})dx/2\sigma \quad (47)$$

$$= 1/2 + \frac{c}{2\sigma k} [(w + \sigma)^k - (\sigma - w)^k] \quad (48)$$

$$= 1/2 + \frac{c}{2\sigma k} \sigma^k [(1 + w/\sigma)^k - (1 - w/\sigma)^k] \quad (49)$$

$$\approx 1/2 + c\sigma^{k-2}w \quad (50)$$

Similarly  $F_2(w) \approx 1/2 + c\sigma^{k-2}(w - a)$

[Boundaries:  $F_1(0) - \frac{1}{2} = 0$ ,  $F_1(\beta a) - \frac{1}{2} \asymp \sigma^{k-2}a$ ,  $F_2(0) - \frac{1}{2} \asymp -\sigma^{k-2}a$ ,  $F_2(\beta a) \asymp \sigma^{k-2}a$ ]

$$F_1(w) - F_2(w) \asymp \sigma_n^{k-2}a.$$

(c) When  $\beta a \leq w \leq \sigma$

$$F_1(w) = \int_{w-\sigma}^0 (1/2 - cx|x|^{k-2})dx/2\sigma + \int_0^{w+\sigma} (1/2 + cx^{k-1})dx/2\sigma \quad (51)$$

$$= 1/2 + \frac{c}{2\sigma k} [(w + \sigma)^k - (\sigma - w)^k] \quad (52)$$

$$= 1/2 + \frac{c}{2\sigma k} \sigma^k [(1 + w/\sigma)^k - (1 - w/\sigma)^k] \quad (53)$$

$$\approx 1/2 + c\sigma^{k-2}w \quad (54)$$

$$\begin{aligned} F_2(w) &= \int_{w-\sigma}^a (1/2 - c(x-a)|x-a|^{k-2})\frac{dx}{2\sigma} + \int_a^{\beta a + \sigma} (1/2 + c(x-a)^{k-1})\frac{dx}{2\sigma} + \int_{\beta a + \sigma}^{w+\sigma} (1/2 + cx^{k-1})\frac{dx}{2\sigma} \\ &= 1/2 + \frac{c}{2\sigma k} [-(\sigma + a - w)^k + (\beta a + \sigma - a)^k + (w + \sigma)^k - (\beta a + \sigma)^k] \\ &\approx 1/2 + \frac{c}{2\sigma k} [-\sigma^k(1 - \frac{k(w-a)}{\sigma}) + \sigma^k(1 + \frac{k(\beta-1)a}{\sigma}) + \sigma^k(1 + \frac{k w}{\sigma}) - \sigma^k(1 + \frac{k\beta a}{\sigma})] \\ &= 1/2 + \frac{c}{2}\sigma^{k-2}[w - a + (\beta - 1)a + w - \beta a] \\ &= 1/2 + c\sigma^{k-2}(w - a) \end{aligned}$$

[Boundaries:  $F_1(\beta a) - \frac{1}{2} \asymp \sigma^{k-2}a$ ,  $F_1(\sigma) - \frac{1}{2} \asymp \sigma^{k-1}$ ,  $F_2(\beta a) \asymp \sigma^{k-2}a$ ,  $F_2(\sigma) - \frac{1}{2} \asymp -\sigma^{k-2}a$ ]

$$F_1(w) - F_2(w) \asymp \sigma^{k-2}a$$

Specifically, verify the boundary at  $\sigma$

$$F_1(\sigma) - F_2(\sigma) = \frac{c}{2\sigma k} [a^k - (\beta a + \sigma - a)^k + (\beta a + \sigma)^k] \quad (55)$$

$$= \frac{c}{2\sigma k} [a^k - \sigma^k(1 + k\frac{\beta a - a}{\sigma}) + \sigma^k(1 + k\frac{\beta a}{\sigma})] \quad (56)$$

$$= \frac{c}{2\sigma k} [a^k + k\sigma^{k-1}a] \quad (57)$$

$$\leq c\sigma^{k-2}a \quad (58)$$

(d) When  $\sigma \leq w \leq a + \sigma$

$$F_1(w) = \int_{w-\sigma}^{w+\sigma} (1/2 + cx^{k-1})dx/2\sigma \quad (59)$$

$$= 1/2 + \frac{c}{2\sigma k}[(w + \sigma)^k - (w - \sigma)^k] \quad (60)$$

$$(61)$$

$$\begin{aligned} F_2(w) &= \int_{w-\sigma}^a (1/2 - c(x-a)|x-a|^{k-2})\frac{dx}{2\sigma} + \int_a^{\beta a + \sigma} (1/2 + c(x-a)^{k-1})\frac{dx}{2\sigma} + \int_{\beta a + \sigma}^{w+\sigma} 1/2 + cx^{k-1}\frac{dx}{2\sigma} \\ &= 1/2 + \frac{c}{2\sigma k}[-(\sigma + a - w)^k + (\beta a + \sigma - a)^k + (w + \sigma)^k - (\beta a + \sigma)^k] \end{aligned}$$

$$F_1(w) - F_2(w) = \frac{c}{2\sigma k}[(\sigma + a - w)^k - (\beta a + \sigma - a)^k - (w - \sigma)^k + (\beta a + \sigma)^k] \quad (62)$$

Differentiating the above term with respect to  $w$ , gives  $\frac{c}{2\sigma}[-(\sigma + a - w)^{k-1} - (w - \sigma)^{k-1}] \leq 0$  because  $\sigma \leq w \leq a + \sigma$  and hence  $F_1(w) - F_2(w)$  is decreasing with  $w$ . We already saw  $F_1(\sigma) - F_2(\sigma) \leq c\sigma^{k-2}a$ . We can also verify that at the other boundary,

$$F_1(a + \sigma) - F_2(a + \sigma) = \frac{c}{2\sigma k}[-(\beta a + \sigma - a)^k - a^k + (\beta a + \sigma)^k] \quad (63)$$

$$= \frac{c}{2\sigma k}[-a^k - \sigma^k(1 + k\frac{\beta a - a}{\sigma}) + \sigma^k(1 + k\frac{\beta a}{\sigma})] \quad (64)$$

$$= \frac{c}{2\sigma k}[-a^k + k\sigma^{k-1}a] \quad (65)$$

$$\leq \frac{c}{2}\sigma^{k-2}a \quad (66)$$

(e) When  $\sigma + a \leq w \leq \beta a + \sigma$

$$F_1(w) = \int_{w-\sigma}^{w+\sigma} (1/2 + cx^{k-1})dx/2\sigma \quad (67)$$

$$= 1/2 + \frac{c}{2\sigma k}[(w + \sigma)^k - (w - \sigma)^k] \quad (68)$$

$$(69)$$

$$\begin{aligned} F_2(w) &= \int_{w-\sigma}^{\beta a + \sigma} (1/2 + c(x-a)^{k-1})\frac{dx}{2\sigma} + \int_{\beta a + \sigma}^{w+\sigma} 1/2 + cx^{k-1}\frac{dx}{2\sigma} \\ &= 1/2 + \frac{c}{2\sigma k}[(\beta a + \sigma - a)^k - (w - \sigma - a)^k + (w + \sigma)^k - (\beta a + \sigma)^k] \end{aligned}$$

$$F_1(w) - F_2(w) = \frac{c}{2\sigma k}[(w - \sigma - a)^k - (\beta a + \sigma - a)^k - (w - \sigma)^k + (\beta a + \sigma)^k] \quad (70)$$

$$(71)$$

Differentiating with respect to  $w$  gives  $\frac{c}{2\sigma}[(w - \sigma - a)^{k-1} - (w - \sigma)^{k-1}] \leq 0$  because  $w - \sigma - a \leq w - \sigma$  and so  $F_1 - F_2$  is decreasing with  $w$ . We know  $F_1(a + \sigma) - F_2(a + \sigma) \leq \frac{c}{2}\sigma^{k-2}a$ , and we can verify at the other boundary that

$$F_1(\beta a + \sigma) - F_2(\beta a + \sigma) = \frac{c}{2\sigma k}[(\beta a - a)^k - (\beta a + \sigma - a)^k - (\beta a)^k + (\beta a + \sigma)^k] \quad (72)$$

$$\approx \frac{c}{2\sigma k}[(\beta a - a)^k - (\beta a)^k - \sigma^k(1 + k\frac{\beta a - a}{\sigma}) + \sigma^k(1 + k\frac{\beta a}{\sigma})] \quad (73)$$

$$= \frac{c}{2\sigma k}[(\beta a - a)^k - (\beta a)^k + k\sigma^{k-1}a] \quad (74)$$

$$\leq \frac{c}{2}\sigma^{k-2}a \quad (75)$$

(f) When  $\beta a + \sigma \leq w \leq \beta a + 2\sigma$

$$F_1(w) = 1/2 + \frac{c}{2\sigma k} [(w + \sigma)^k - (w - \sigma)^k]$$

$$F_2(w) = \int_{w-\sigma}^{\beta a + \sigma} 1/2 + c(x-a)^{k-1} dx / 2\sigma + \int_{\beta a + \sigma}^{w+\sigma} 1/2 + cx^{k-1} dx / 2\sigma \quad (76)$$

$$= 1/2 + \frac{c}{2k\sigma} [(\beta a + \sigma - a)^k - (w - \sigma - a)^k + (w + \sigma)^k - (\beta a + \sigma)^k] \quad (77)$$

Hence

$$F_1(w) - F_2(w) = \frac{c}{2\sigma k} [(\beta a + \sigma)^k - (\beta a + \sigma - a)^k + (w - \sigma - a)^k - (w - \sigma)^k] \quad (78)$$

$$\approx \frac{c}{2\sigma k} [(\beta a + \sigma)^{k-1} ka - (w - \sigma)^{k-1} ka] \quad (79)$$

$$\leq \frac{ca}{2\sigma} [(\beta a + \sigma)^{k-1} - (\beta a)^{k-1}] \quad (80)$$

$$\approx c/2\sigma^{k-2} a \quad (81)$$

$$\asymp \sigma^{k-2} a \quad (82)$$

Alternately, by the same argument as in the previous case, differentiating with respect to  $w$  gives  $\frac{c}{2\sigma} [(w - \sigma - a)^{k-1} - (w - \sigma)^{k-1}] \leq 0$  because  $w - \sigma - a \leq w - \sigma$  and so  $F_1 - F_2$  is decreasing with  $w$ . We know  $F_1(\beta a + \sigma) - F_2(\beta a + \sigma) \leq \frac{c}{2} \sigma^{k-2} a$ , and we can verify at the other endpoint that

$$F_1(\beta a + 2\sigma) - F_2(\beta a + 2\sigma) = 0 \quad (83)$$

(g) When  $w \geq \beta a + 2\sigma$ ,  $F_1(w) = F_2(w)$

That completes the proof of the second proposition.

---

## 2 “Linear” Convolved Regression Function, Justifying Eq.(8,9,10,11)

For ease of presentation, let us assume the threshold is at 0, and define  $m \in \mathcal{P}(c, C, k, \sigma)$  as

$$m(x) = \begin{cases} 1/2 + f(x) + \Delta(x) & \text{if } x \geq 0 \\ 1/2 - f(x) & \text{if } x < 0 \end{cases}$$

Due to assumption (M),  $\Delta(x)$  must be 0 when  $0 \leq x \leq \sigma$ . Hence, the Taylor expansion of  $\Delta(x)$  around  $x = \sigma$  looks like

$$\Delta(x) = (x - \sigma)\Delta'(\sigma) + (x - \sigma)^2\Delta''(\sigma) + \dots$$

If one represents, as before,  $F(x) = m \star U$ , then directly from the definitions, it follows for  $\delta > 0$  that

$$F(\delta) - F(0) = \int_{\sigma}^{\sigma+\delta} (1/2 + f(z) + \Delta(z)) \frac{dz}{2\sigma} - \int_{-\sigma}^{-\sigma+\delta} (1/2 - f(z)) \frac{dz}{2\sigma}$$

In particular, due to the form (T) of  $m$ , let  $f = c_1|x|^{k-1}$  for some  $c \leq c_1 \leq C$  (we could also break  $f$  into parts where it has different  $c_1$ s but this is a technicality and does not change the behaviour). Then

$$F(\delta) - F(0) = \frac{c_1}{2k\sigma} [(x^k)_{\sigma}^{\sigma+\delta} - (x^k)_{-\sigma}^{-\sigma+\delta}] + \int_{\sigma}^{\delta+\sigma} [(z - \sigma)\Delta'(\sigma) + (z - \sigma)^2\Delta''(\sigma) + \dots] \frac{dz}{2\sigma} \quad (84)$$

$$= \frac{c_1}{2k\sigma} [(\sigma + \delta)^k - \sigma^k + (-\sigma + \delta)^k - (-\sigma)^k] + \frac{[(z - \sigma)^2]_{\sigma}^{\sigma+\delta}}{4\sigma} \Delta'(\sigma) + \dots \quad (85)$$

$$\approx c_1\sigma^{k-2}\delta + \frac{\delta^2}{4\sigma} \Delta'(\sigma) + o(\delta^2) \quad (86)$$

Thus we get behaviour of the form

$$F(t + h) \geq 1/2 + c\sigma^{k-2}h$$

One can derive similar results when  $\delta < 0$ .

The claims about WIDEHIST immediately follow from the above, but we can make them a little more explicit. First note that  $F(w) = 1/2 + \frac{c}{\sigma}(w - t)$  for  $w$  close to  $t$  (in fact for  $w \in [t - \sigma, t + \sigma]$ ), as seen in Section 1 of this Appendix. Consider a bin just outside the bins  $i^* - 1, i^*, i^* + 1$ , for instance bin  $i = i^* + 2$  centered at  $b_i$  (note  $b_i \geq t + h$ ), and let  $J$  be the set of points  $j$  that fall within  $b_i \pm \sigma/2$ . Define

$$\hat{p}_i = \frac{1}{n\sigma/2R} \sum_{j \in J} \mathbb{I}(Y_j = +)$$

where  $Y_j \in \{\pm 1\}$  are observations at points  $j \in J$ . Now, we have, since  $P(Y_j = +) = F(j)$

$$\begin{aligned} \mathbb{E}[\hat{p}_i] &= \frac{1}{n\sigma/2R} \sum_{j \in J} F(j) \\ &= \frac{1}{n\sigma/2R} \left[ \sum_{j \in J} 1/2 + \frac{c}{\sigma}(X_j - t) \right] \\ &\approx 1/2 + \frac{1}{\sigma} \int_{b_i - t - \sigma/2}^{b_i - t + \sigma/2} \frac{c}{\sigma} z dz \\ &= 1/2 + \frac{c}{2\sigma^2} [(b_i - t + \sigma/2)^2 - (b_i - t - \sigma/2)^2] \\ &= 1/2 + \frac{c}{\sigma}(b_i - t) \\ &\geq 1/2 + \frac{c}{\sigma}h \end{aligned}$$

### 3 Justifying Claims in the Active Upper Bounds

**Phase 1** ( $k = 1$ ). In the first phase of the algorithm, it is possible that  $\sigma \leq R_e/n$  but  $\geq R_e e^{-n}$  - in other words the noise may be small enough that passive learning cannot make out that we are in the errors-in-variables setting, and then the passive estimator will get a point error of  $\frac{C_1 R_e}{n/E}$  in each of those epochs (as if there is no feature noise). This point error is to the best point in epoch  $e$ , which we can prove by induction is the true threshold  $t$  with high probability. Since it trivially holds in the first epoch ( $t \in D_1 = [-1, 1]$ ), we assume that it is true in epoch  $e - 1$ . Then, in epoch  $e$ , the true threshold  $t$  is still the best point if the estimator  $x_{e-1}$  of epoch  $e - 1$  was within  $R_e$  of  $t$ , or in other words if  $|x_{e-1} - t| \leq R_e$ . This would definitely hold if  $\frac{C_1 R_{e-1}}{n/E} \leq R_e$  i.e.  $n \geq 2C_1 E = 2C_1 \lceil \log(1/\sigma) \rceil$ , which is true since  $\sigma \succ \exp\{-n/2C_1\}$ . However, the algorithm cannot stay in this phase of  $\sigma \leq R_e/n$  this until the last epoch since  $\sigma > R_{E+1} = R_E/2$ .

**Phase 2** ( $k = 1$ ). When  $\sigma \geq R_e/n$ , WIDEHIST gets an estimation error of  $C_2 \sqrt{\frac{R_e \sigma}{n/E}}$  in epoch  $e$ . This error is the distance to the best point in epoch  $e$ , which is  $t$  by the following similar induction. In epoch  $e$ ,  $t$  is still the best point only if  $|x_{e-1} - t| \leq R_e$ , i.e.  $C_2^2 \frac{R_{e-1} \sigma}{n/E} \leq R_e^2$  i.e.  $n R_e \geq 2C_2^2 E \sigma$  which holds since  $R_e > \sigma$  for all  $e \leq E$  and since  $n \geq 2C_2^2 E$  ( $\sigma \succ \exp\{-n/2C_2^2\}$  implies  $E \leq n/2C_2^2$ ).

The final error of the algorithm is  $\sqrt{\frac{R_E \sigma}{n/E}} = \tilde{O}(\frac{\sigma}{\sqrt{n}})$  since  $R_E < 2\sigma$ .

**Explanation for  $k > 1$**  Assume  $\sigma \succ n^{-\frac{1}{2k-2}}$ , otherwise active learning won't notice the feature noise, and so  $\log(1/\sigma) \leq \frac{\log n}{(2k-2)}$ . Choose total epochs  $E = \lceil \log(\frac{1}{\sigma}) \rceil \leq \frac{\log n}{(2k-2)} \leq C \log n$  for some  $C$ . In each epoch of length  $n/E$  in a region of radius  $R_e = 2^{-e+1}$ , we get a passive bound of  $C_1 \sqrt{\frac{R_e}{\sigma^{2k-3} n/E}}$  whenever<sup>1</sup>  $\sigma > (\frac{R_e}{n})^{\frac{1}{2k-1}}$ .

By the same logic as for  $k = 1$ , we need to verify that  $|x_{e-1} - t| \leq R_e$  so that if  $t$  was in the search space in epoch  $e - 1$  then it remains in the search space in epoch  $e$ , i.e. we want to verify  $C_1^2 \frac{R_{e-1}}{\sigma^{2k-3} n/E} \leq R_e^2 \Leftrightarrow \sigma^{2k-2} R_e \geq \frac{2C_1^2 E}{n} \sigma$  which is true since<sup>2</sup>  $R_e \geq \sigma$  and<sup>3</sup>  $\sigma^{2k-2} > 2C_1^2 E/n$ .

The final point error is given by the passive algorithm in the last epoch as  $\sqrt{\frac{R_E}{\sigma^{2k-3} n/E}}$ ; since  $R_E < 2\sigma$  and  $E \leq C \log n$ , this becomes  $\leq \frac{1}{\sigma^{k-2}} \sqrt{\frac{1}{n}}$ .

---

<sup>1</sup>This must happen at some  $e \leq E = \lceil \log(\frac{1}{\sigma}) \rceil$  because  $R_E = 2^{-E+1} < 2\sigma < \sigma \sigma^{2k-2} n$  since  $\sigma \succ n^{-\frac{1}{2k-2}}$  and hence in the last epoch  $\sigma > (\frac{R_E}{n})^{\frac{1}{2k-1}}$ .

<sup>2</sup>By choice of  $E = \lceil \log(\frac{1}{\sigma}) \rceil$ ,  $R_e \geq R_E \geq \sigma \geq R_{E+1}$ .

<sup>3</sup>Since  $\sigma \succ n^{-\frac{1}{2k-2}}$  we get  $\sigma^{2k-2} > 2C_1^2 E/n$  since  $E \leq C \log n$ .
